# Supplementary material for: Prevalence, Antimicrobial Resistance and Toxin-Encoding Genes of Clostridioides difficile from Environmental Sources Contaminated by Feces
Source: MDPI journal article supplement (doi:10.3390/antibiotics12010162), 2023-01-12
Supplement: s1 [file s1]

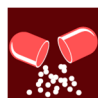

Article

# Prevalence, Antimicrobial Resistance and Toxin-Encoding Genes of *Clostridioides difficile* from Environmental Sources Contaminated by Feces

Khald Blau and Claudia Gallert \*

Department of Microbiology–Biotechnology, Faculty of Technology, University of Applied Sciences  
Emden/Leer, 26723 Emden, Germany; khald.blau@hs-emden-leer.de

\* Correspondence: claudia.gallert@hs-emden-leer.de

**Table S1:** Quantification of environmental *C. difficile* from faecally contaminated environmental samples.

| Sample No. | Sample Source                   | Cq of 16S rRNA |       |                    |       | Weight/Volume (g<br>or mL) | Mean (Cq)<br>Not diluted | Mean (Cq)<br>Diluted 1:10 | No. of CD cells per g or mL |              |
|------------|---------------------------------|----------------|-------|--------------------|-------|----------------------------|--------------------------|---------------------------|-----------------------------|--------------|
|            |                                 | Not diluted    |       | Diluted (1:10)     |       |                            |                          |                           | Not diluted                 | Diluted × 10 |
| S-DSD-1    | Digested sludge- amended soils  | ND             | 36.02 | ND                 | 40.79 | 0.20 g                     | 36.02                    | 40.79 <sup>a</sup>        | 44.60                       | UDL          |
| S-DSD-2    |                                 | 33.04          | 33.75 | 34.44              | 35.70 | 0.20 g                     | 33.40                    | 35.07                     | 267.73                      | 853.13       |
| S-DSD-3    |                                 | 34.17          | 35.44 | ND                 | 38.30 | 0.20 g                     | 34.81                    | 38.30 <sup>a</sup>        | 102.24                      | 94.02        |
| DSD-6-22   | Digested sewage sludge          | 32.33          | 33.32 | 40.34              | 38.16 | 0.20 g                     | 32.83                    | 39.25 <sup>a</sup>        | 395.12                      | 103.45       |
| DSD-7-21   |                                 | ND             | 39.01 | ND                 | ND    | 0.15 g                     | 39.01 <sup>a</sup>       | -                         | UDL                         | -            |
| DSD-4-21   |                                 | 38.32          | 39.14 | 33.07              | 35.81 | 0.15 g                     | 38.73 <sup>a</sup>       | 34.44                     | UDL                         | 761.40       |
| DSD-3-21   |                                 | 35.43          | 34.31 | 36.21              | 35.18 | 0.100 g                    | 34.87                    | 35.70                     | 120.47                      | 694.36       |
| RS-5-22    | Raw sewage                      | 31.28          | 30.96 | 32.1               | 34.82 | 100 mL                     | 31.12                    | 33.46                     | 1.44                        | 3.00         |
| RS-3-21    |                                 | 32.30          | 32.70 | 33.31              | 33.18 | 35 mL                      | 32.50                    | 33.22                     | 1.24                        | 7.44         |
| RS-7-21    |                                 | 34.12          | 35.02 | 36.22              | 36.30 | 43 mL                      | 34.57                    | 36.26                     | 1.39                        | 4.50         |
| RS-4-21    |                                 | 33.92          | 35.70 | 35.02              | 35.07 | 100 mL                     | 34.81                    | 35.05                     | 0.18                        | 1.56         |
| TS-6-22    | Treated sewage                  | 34.38          | 35.02 | 38.46              | ND    | 300 mL                     | 34.70                    | 38.46 <sup>a</sup>        | 0.044                       | UDL          |
| TS-7-21    |                                 | ND             | ND    | ND                 | 39.16 | 50 mL                      | -                        | 39.16 <sup>a</sup>        | -                           | UDL          |
| TS-4-21    |                                 | 33.15          | 32.36 | 36.72              | 35.15 | 100 mL                     | 32.76                    | 35.94                     | 0.49                        | 0.59         |
| RSD-3-21   | Raw sewage sludge               | ND             | ND    | 35.97              | 34.92 | 0.100 g                    | -                        | 35.45                     | -                           | 820.53       |
| RSD-4-21   |                                 | 37.64          | 39.03 | 43.53 <sup>b</sup> | 37.46 | 0.15 g                     | 38.34 <sup>a</sup>       | 37.46                     | UDL                         | 94.77        |
| RSD-7-21   |                                 | 35.84          | 37.41 | 36.12              | ND    | 0.15 g                     | 36.63                    | 36.12                     | 16.86                       | 238.89       |
| RSD-12-21  |                                 | 36.62          | 38.95 | 34.74              | 33.51 | 0.20 g                     | 36.62                    | 34.13                     | 20.30                       | 1107.60      |
| AS-3-21    | Activated sewage sludge         | 35.59          | n.d.  | 37.72              | 36.53 | 0.15 g                     | 35.59                    | 37.13                     | 34.46                       | 119.42       |
| Control    | Anaerobic lab-scale bioreactors | 36.06          | 36.06 | 35.65              | 36.04 | 0.20 g                     | 36.06                    | 35.85                     | 30.68                       | 367.67       |
| Experiment | for sewage sludge digestion     | 36.58          | 36.16 | 36.62              | 36.57 | 0.20 g                     | 36.37                    | 36.60                     | 24.85                       | 213.23       |
| CF1        | Faeces of calves                | ND             | ND    | ND                 | ND    | 0.15 g                     | -                        | -                         | -                           | -            |
| CF2        |                                 | ND             | ND    | ND                 | ND    | 0.30 g                     | -                        | -                         | -                           | -            |

|      |       |       |       |       |        |                    |                    |              |                |
|------|-------|-------|-------|-------|--------|--------------------|--------------------|--------------|----------------|
| C3   | ND    | ND    | ND    | ND    | 0.15 g | -                  | -                  | -            | -              |
| CF4  | ND    | ND    | ND    | ND    | 0.15 g | -                  | -                  | -            | -              |
| CF5  | ND    | ND    | ND    | 42.83 | 0.15 g | -                  | 42.83 <sup>a</sup> | -            | UDL            |
| C6   | ND    | ND    | ND    | ND    | 0.15 g | -                  | -                  | -            | -              |
| CF7  | ND    | ND    | ND    | ND    | 0.15 g | -                  | -                  | -            | -              |
| CF8  | 37.72 | 38.40 | 44.59 | ND    | 0.15 g | 38.06 <sup>a</sup> | 44.59 <sup>a</sup> | UDL          | UDL            |
| CF9  | ND    | 38.39 | ND    | ND    | 0.15 g | 38.39 <sup>a</sup> | -                  | UDL          | -              |
| CF10 | 37.15 | 36.23 | 38.93 | 37.96 | 0.15 g | 36.69              | 38.45 <sup>a</sup> | <b>96.87</b> | UDL            |
| CF11 | ND    | ND    | 37.25 | ND    | 0.15 g | -                  | 37.25              | -            | <b>1561.62</b> |
| CF12 | ND    | ND    | 34.18 | 34.19 | 0.20 g | -                  | 34.19              | -            | <b>1063.32</b> |
| CF15 | ND    | ND    | 37.36 | ND    | 0.15 g | -                  | 37.36              | -            | <b>1212.20</b> |
| CF16 | ND    | ND    | ND    | ND    | 0.30 g | -                  | -                  | -            | -              |
| CF17 | ND    | ND    | 37.20 | ND    | 0.15 g | -                  | 37.20              | -            | <b>1752.17</b> |
| CF18 | 38.92 | 39.55 | 36.44 | 36.52 | 0.40 g | 39.24 <sup>a</sup> | 36.48              | UDL          | <b>111.66</b>  |

Table S1: Continued.

| Sample No. | Sample Source                               | Cq of 16S rRNA     |       |                |       | Weight/Volume (g<br>or mL) | Mean (Cq)<br>Not diluted | Mean (Cq)<br>Diluted 1:10 | No. of CD cells per g or mL |              |
|------------|---------------------------------------------|--------------------|-------|----------------|-------|----------------------------|--------------------------|---------------------------|-----------------------------|--------------|
|            |                                             | Not diluted        |       | Diluted (1:10) |       |                            |                          |                           | Not diluted                 | Diluted × 10 |
| CF19       | Faeces of claves                            | ND                 | ND    | ND             | ND    | 0.15 g                     | -                        | -                         | -                           | -            |
| CF20       |                                             | ND                 | ND    | ND             | 38.89 | 0.15 g                     | -                        | 38.89 <sup>a</sup>        | -                           | UDL          |
| CF-1       |                                             | ND                 | ND    | ND             | 37.54 | 0.15 g                     | -                        | 37.54                     | -                           | 186.83       |
| CF-2       |                                             | ND                 | ND    | ND             | ND    | 0.15 g                     | -                        | -                         | -                           | -            |
| CF-3       |                                             | ND                 | ND    | ND             | ND    | 0.15 g                     | -                        | -                         | -                           | -            |
| YCF1       |                                             | 36.30              | ND    | 37.28          | ND    | 0.16 g                     | 36.30                    | 37.28                     | 18.79                       | 113.95       |
| YCF2       |                                             | 36.89              | 38.58 | n.d.           | 36.22 | 0.16 g                     | 37.74                    | 36.22                     | 8.15                        | 248.69       |
| YCF3       |                                             | 37.30              | ND    | ND             | ND    | 0.15 g                     | 37.30                    | -                         | 11.98                       | -            |
| CF2.1      |                                             | ND                 | ND    | 36.38          | 37.09 | 0.15 g                     | -                        | 36.74                     | -                           | 330.93       |
| CF2.2      |                                             | 37.24              | ND    | 36.63          | ND    | 0.15 g                     | 37.24                    | 36.63                     | 23.52                       | 355.28       |
| CF2.3      |                                             | ND                 | ND    | 38.67          | ND    | 0.15 g                     | -                        | 38.67 <sup>a</sup>        | -                           | UDL          |
| CF3.1      |                                             | ND                 | ND    | ND             | ND    | 0.15 g                     | -                        | -                         | -                           | -            |
| CF3.2      |                                             | ND                 | ND    | ND             | ND    | 0.15 g                     | -                        | -                         | -                           | -            |
| CF3.3      |                                             | ND                 | ND    | ND             | ND    | 0.15 g                     | -                        | -                         | -                           | -            |
| YC-CM1     |                                             | 36.65              | ND    | ND             | ND    | 0.15 g                     | 36.65                    | -                         | 29.63                       | -            |
| YC-AM1     |                                             | ND                 | ND    | ND             | 36.37 | 0.15 g                     | -                        | 36.37                     | -                           | 360.01       |
| TDB-1      | Thermophilic digester for treating biowaste | ND                 | ND    | ND             | ND    | 0.20 g                     | -                        | -                         | -                           | -            |
| TD-1       | Thermophilic digester for                   | 41.31 <sup>b</sup> | 35.43 | 37.47          | 35.78 | 0.20g                      | 35.43                    | 36.63                     | 47.09                       | 208.93       |
| TD-2       | treating sewage sludge                      | ND                 | ND    | ND             | 38.25 | 0.15 g                     | -                        | 38.25 <sup>a</sup>        | -                           | UDL          |
| Soil-1     | Soil (collected from cattle                 | ND                 | ND    | ND             | 36.55 | 0.15 g                     | -                        | 36.55                     | -                           | 375.63       |
| Soil-2     | farm)                                       | 37.86              | n.d.  | 37.38          | 37.64 | 0.15 g                     | 37.86                    | 37.51                     | 14.91                       | 190.83       |
| MMF-1      | Mixed storage cow manure                    | 36.85              | ND    | ND             | 42.42 | 0.15 g                     | 36.85                    | 42.42 <sup>a</sup>        | 16.68                       | UDL          |
| MMF-1      |                                             | 36.18              | 37.16 | ND             | ND    | 0.15 g                     | 36.67                    | -                         | 19.05                       | -            |

|       |                  |       |       |       |    |                 |                    |                    |              |      |
|-------|------------------|-------|-------|-------|----|-----------------|--------------------|--------------------|--------------|------|
| MMO-1 |                  | 37.25 | n.d.  | 38.58 | ND | 0.15 g          | 37.25              | 38.58 <sup>a</sup> | <b>19.46</b> | UDL  |
| MMO-2 |                  | ND    | 37    | ND    | ND | 0.15 g          | 37.00              | -                  | <b>19.36</b> | -    |
| SMM-1 |                  | 36.80 | ND    | ND    | ND | 0.22 g          | 36.80              | -                  | <b>15.09</b> | -    |
| SMM2  |                  | ND    | ND    | ND    | ND | 0.15 g          | -                  | -                  | -            | -    |
| BP1   | Biogas plant     | ND    | ND    | ND    | ND | 0.40 g          | -                  | -                  | -            | -    |
| BP2   |                  | ND    | ND    | ND    | ND | 0.21 g          | -                  | -                  | -            | -    |
| FFC   | Adult cow faeces | ND    | ND    | ND    | ND | 0.15 g          | -                  | -                  | -            | -    |
| C1.1  |                  | ND    | ND    | ND    | ND | 0.15 g          | -                  | -                  | -            | -    |
| C1.2  |                  | ND    | ND    | ND    | ND | 0.20 g          | -                  | -                  | -            | -    |
| C1.3  |                  | ND    | ND    | ND    | ND | 0.20 g          | -                  | -                  | -            | -    |
| GS-1  | Grass silage     | 35.82 | 36.97 | 37.37 | ND | Pellet of 5 g   | 36.40              | 37.37              | <b>1.12</b>  | 5.71 |
| MS-1  | Maize silage     | 37.52 | ND    | ND    | ND | Pellet of 5 g   | 37.52              | -                  | <b>0.49</b>  | -    |
| HF1   | Horse faeces     | 38.20 | ND    | ND    | ND | Pellet of 5 g   | 38.20 <sup>a</sup> | -                  | UDL          | -    |
| HF2   | Horse faeces     | ND    | ND    | ND    | ND | Pellet of 0.5 g | -                  | -                  | -            | -    |
| HF3   |                  | 35.75 | ND    | ND    | ND | 0.13 g          | 35.75              | -                  | <b>63.93</b> | -    |
| HF4   |                  | ND    | ND    | ND    | ND | 0.20 g          | -                  | -                  | -            | -    |
| HF6   |                  | ND    | ND    | ND    | ND | 0.25 g          | -                  | -                  | -            | -    |
| HF7   |                  | ND    | ND    | ND    | ND | 0.25 g          | -                  | -                  | -            | -    |
| HF8   |                  | 37.36 | n.d.  | 38.91 | ND | 0.16 g          | 37.36              | 38.91 <sup>a</sup> | <b>16.33</b> | UDL  |
| HF9   |                  | ND    | ND    | ND    | ND | Pellet of 5 g   | -                  | -                  | -            | -    |
| HF10  |                  | ND    | ND    | ND    | ND | 0.26 g          | -                  | -                  | -            | -    |

<sup>a</sup>UDL: under the detection limit of CD 16S rRNA gene. <sup>b</sup>Major difference replicates (discarded results). ND: not determined. Bold values: Final quantification results depend on Cq values.

**Table S2.** Comparison of detection results of environmental *C. difficile* between qPCR and *C. difficile* selective enrichment culture (CSEC).

| Farm No / Sample ID             | Sample No. | Sample Type                                                   | No. of cases |    |      |    |               |    |
|---------------------------------|------------|---------------------------------------------------------------|--------------|----|------|----|---------------|----|
|                                 |            |                                                               | qPCR         |    | CSEC |    | qPCR and CSEC |    |
|                                 |            |                                                               | +            | -  | +    | -  | +             | -  |
| Farm 1                          | 3          | Calf faeces                                                   | 0            | 3  | 1    | 2  | 0             | 2  |
| Farm 2                          | 3          | Calf faeces                                                   | 0            | 3  | 0    | 3  | 0             | 3  |
| Farm 3                          | 3          | Calf faeces                                                   | 0            | 3  | 0    | 3  | 0             | 3  |
| Farm 4                          | 3          | Calf faeces                                                   | 3            | 0  | 3    | 0  | 3             | 0  |
| Farm 5                          | 2          | Biogas plant                                                  | 0            | 2  | 2    | 0  | 0             | 0  |
| Farm 6                          | 3          | Calf faeces                                                   | 2            | 1  | 3    | 0  | 2             | 0  |
| Farm 7                          | 3          | Calf faeces                                                   | 1            | 2  | 3    | 0  | 1             | 0  |
| Farm 8                          | 4          | Adult cow faeces                                              | 0            | 4  | 0    | 4  | 0             | 4  |
|                                 | 8          | Calf faeces                                                   | 4            | 4  | 0    | 8  | 0             | 4  |
|                                 | 2          | Mixed storage manure                                          | 1            | 1  | 0    | 2  | 0             | 1  |
|                                 | 1          | Grass silage                                                  | 1            | 0  | 0    | 1  | 0             | 0  |
|                                 | 1          | Maize silage                                                  | 1            | 0  | 0    | 1  | 0             | 0  |
| Farm 9                          | 4          | Mixed storage cow manure                                      | 4            | 0  | 0    | 4  | 0             | 0  |
|                                 | 6          | Calf faeces                                                   | 4            | 2  | 0    | 6  | 0             | 2  |
|                                 | 2          | Soil (collected from cattle farm)                             | 2            | 0  | 1    | 1  | 1             | 0  |
| WWTP samples                    | 4          | Raw sewage (influent)                                         | 4            | 0  | 4    | 0  | 4             | 0  |
|                                 | 3          | Treated sewage (effluent)                                     | 2            | 1  | 0    | 3  | 0             | 1  |
|                                 | 4          | Raw sewage sludge                                             | 4            | 0  | 3    | 1  | 3             | 0  |
|                                 | 4          | Digested sewage sludge                                        | 3            | 1  | 4    | 0  | 3             | 0  |
|                                 | 1          | Activated sewage sludge                                       | 1            | 0  | 1    | 0  | 1             | 0  |
| S-DSD                           | 3          | Digested sludge-amended soils                                 | 3            | 0  | 3    | 0  | 3             | 0  |
| TD/TDB                          | 3          | Thermophilic digester for treating sewage sludge or biowaste  | 1            | 2  | 2    | 1  | 1             | 1  |
| Anaerobic lab-scale bioreactors | 2          | Thermophilic digestion of sewage sludge: Control / Experiment | 2            | 0  | 2    | 0  | 2             | 0  |
| HF                              | 9          | Horse faeces                                                  | 2            | 7  | 0    | 9  | 0             | 7  |
| Total                           | 81         |                                                               | 45           | 36 | 32   | 49 | 24            | 28 |
